# Supplementary material for: Engineering of a rough auxotrophic mutant Salmonella Typhimurium for effective delivery
Source: PubMed Central journal article supplement (PMC5986645; doi:10.18632/oncotarget.25192), 2018-05-22
Supplement: oncotarget-09-25441-s001.pdf [file oncotarget-09-25441-s001.pdf]

## Engineering of a rough auxotrophic mutant *Salmonella* Typhimurium for effective delivery

### SUPPLEMENTARY MATERIALS

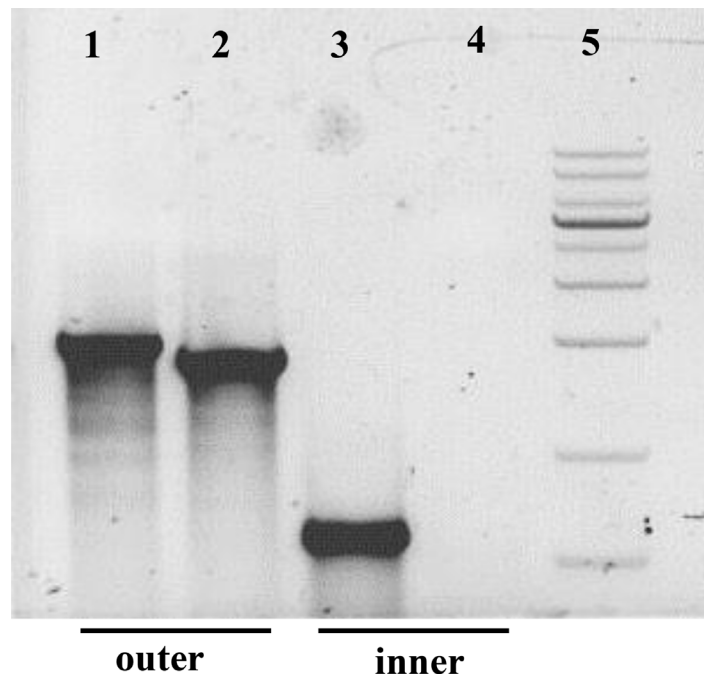

**Supplementary Figure 1: PCR amplification of *rfaL* gene regions, 1% agarose gel image of deletion confirmation.** Lane 1, wild type JOL401 DNA band (~2 kbp) amplified using *rfaL* outer flanking PCR primers; lane 2, mutant JOL1800 DNA band (~1.7 kbp) amplified using *rfaL* outer flanking PCR primers; lane 3, wild type JOL401 DNA band (~700 bp) amplified using *rfaL* inner PCR primers; lane 4, absence of amplified band in JOL1800 due to deletion of *rfaL* gene; and lane 5, 1 kbp DNA ladder marker.

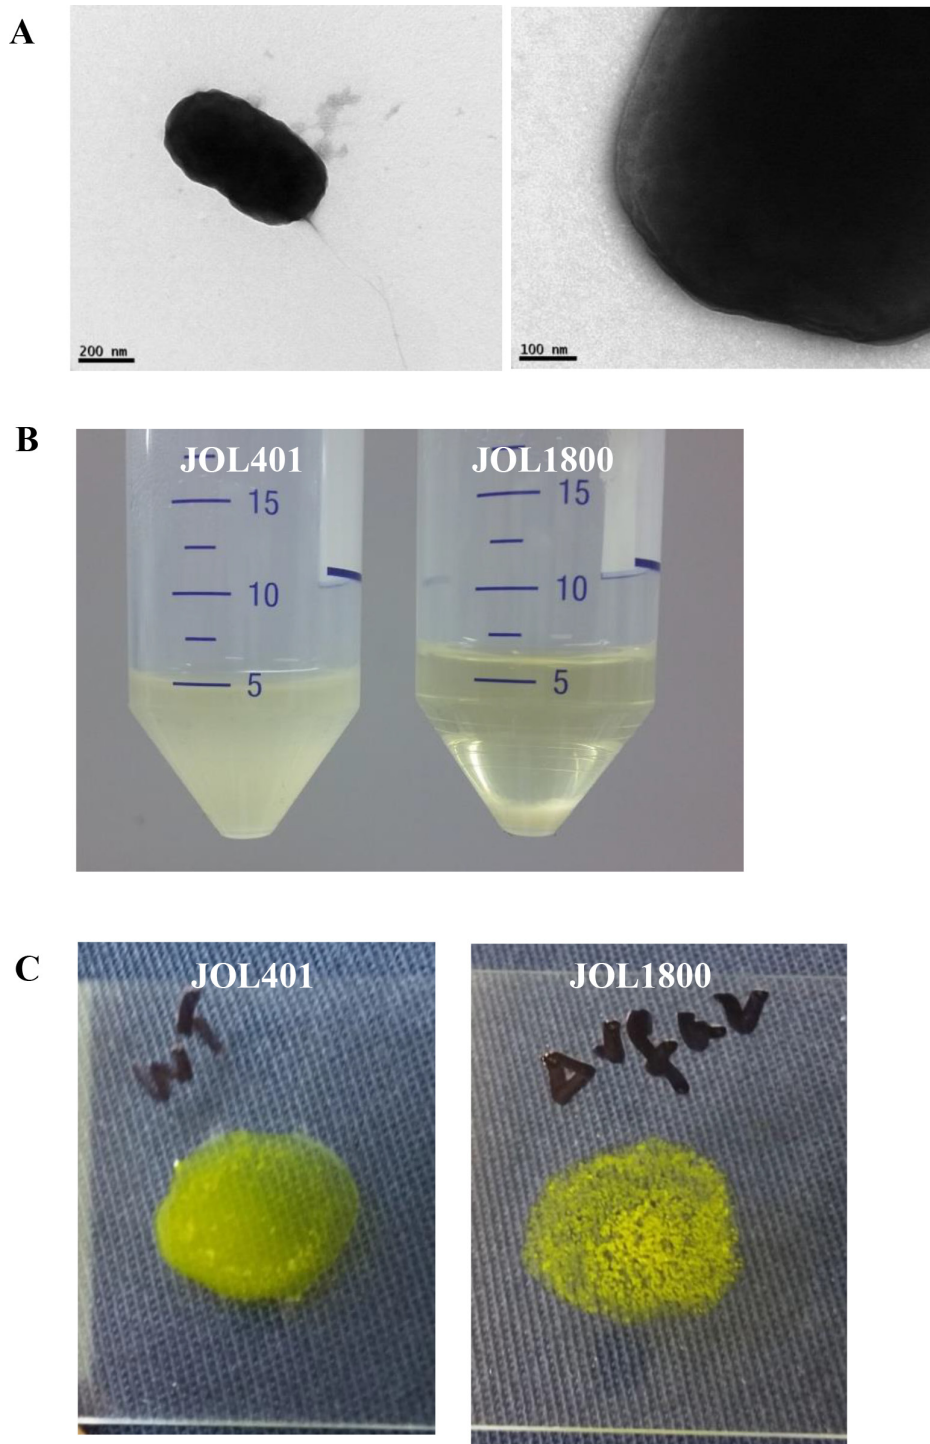

**Supplementary Figure 2: Phenotypic characterization of JOL1800.** (A) Electron microscopy. To ascertain the bacterial morphology and surface integrity, JOL1800 was subjected to electron microscopic analysis. Despite multiple genes affecting membrane synthesis (i.e., *asd*, *rfaL* genes) deletion, disruption in flagella-assembly, weakened or disruption in membrane structures due to deletion was not evident from direct EM observation. (B) Sedimentation Rate. Auto-agglutination of rough strains resulted in heavier bacterial-mass formation, increase sediment rate was observed on JOL1800 cultures. Figure depicts culture settling for ~10 hr. (C) Acriflavine agglutination assay. Ten  $\mu$ l of acriflavine solution (0.1%w/v) was mixed with a loop-full of fresh *Salmonella* colony. Agglutination due to hydrophobic interaction validates the surface properties of rough strain. JOL1800 should strong agglutination as compared to wild type JOL401.

| j           | i | T <sub>ij</sub> | N <sub>ij</sub> | C <sub>ij</sub> | C* <sub>ij</sub> | CA <sub>ij</sub> | I <sub>ij</sub> | IA <sub>ij</sub> | NA <sub>ij</sub> | P <sub>ij</sub> |
|-------------|---|-----------------|-----------------|-----------------|------------------|------------------|-----------------|------------------|------------------|-----------------|
| JOL401      | 1 | 3               | 8               | 0               | 0.25             | 0.25             | 7.75            | 27.5             | 27.75            | 0.9009          |
|             | 2 | 7               | 8               | 0               | 0.25             | 0.5              | 7.75            | 19.75            | 20.25            | 2.46914         |
|             | 3 | 14              | 8               | 1               | 1                | 1.5              | 7               | 12               | 13.5             | 11.1111         |
|             | 4 | 21              | 8               | 3               | 3                | 4.5              | 5               | 5                | 9.5              | 47.3684         |
| JOL912      | 1 | 3               | 8               | 0               | 0.25             | 0.25             | 7.75            | 22.75            | 23               | 1.08696         |
|             | 2 | 7               | 8               | 1               | 1                | 1.25             | 7               | 15               | 16.25            | 7.69231         |
|             | 3 | 14              | 8               | 2               | 2                | 3.25             | 6               | 8                | 11.25            | 28.8889         |
|             | 4 | 21              | 8               | 6               | 6                | 9.25             | 2               | 2                | 11.25            | 82.2222         |
| JOL1800ORAL | 1 | 3               | 8               | 0               | 0.25             | 0.25             | 7.75            | 18               | 18.25            | 1.36986         |
|             | 2 | 7               | 8               | 2               | 2                | 2.25             | 6               | 10.25            | 12.5             | 18              |
|             | 3 | 14              | 8               | 4               | 4                | 6.25             | 4               | 4.25             | 10.5             | 59.5238         |
|             | 4 | 21              | 8               | 8               | 7.75             | 14               | 0.25            | 0.25             | 14.25            | 98.2456         |
| JOL1800IM   | 1 | 3               | 8               | 0               | 0.25             | 0.25             | 7.75            | 18               | 18.25            | 1.36986         |
|             | 2 | 7               | 8               | 1               | 1                | 1.25             | 7               | 10.25            | 11.5             | 10.8696         |
|             | 3 | 14              | 8               | 5               | 5                | 6.25             | 3               | 3.25             | 9.5              | 65.7895         |
|             | 4 | 21              | 8               | 8               | 7.75             | 14               | 0.25            | 0.25             | 14.25            | 98.2456         |

\* Observed data modified by Bartlett's cuning  
- j = (REF, TEST), index of the vaccine strain used  
- i = (1, 2, 3, 4), index of the slaughter time  
- T<sub>ij</sub> = (3, 6, 9, 12), corresponding slaughter time point in weeks post-inoculation of mice inoculated with strain j  
- N<sub>ij</sub> = number of mice inoculated with strain j and slaughtered at each time index i  
- C<sub>ij</sub> = number of mice inoculated with strain j found to be 'cured' at slaughter time index i  
- CA<sub>ij</sub> = number of accumulated cured mice at slaughter time index i for strain j  
- I<sub>ij</sub> = number of mice inoculated with strain j found to be 'infected' at slaughter time index i  
- IA<sub>ij</sub> = number of accumulated infected mice at slaughter time index i for strain j  
- NA<sub>ij</sub> = total number of accumulated mice at slaughter time index i for strain j  
- P<sub>ij</sub> = probability that a mouse inoculated with strain j and slaughtered at time index i be cured

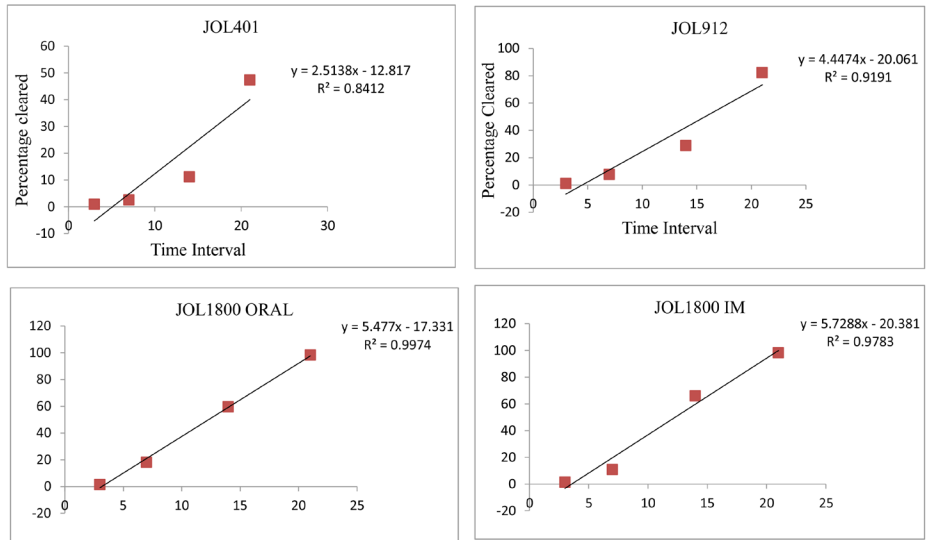

Reference: Pouillot, R., Grilló, M. J., Alabart, J. L., Garin Bastuji, B. & Blasco, J. M. Statistical procedures for calculating the residual virulence of *Brucella abortus* strain 19 (S19) and *Brucella melitensis* strain Rev 1 vaccines in mice: theoretical basis and practical applications. *Rev. Sci. Tech.* **22**, 1051–1063 (2003).

| Strains      | Recovery time (days) |      |      |
|--------------|----------------------|------|------|
|              | RT16                 | RT50 | RT84 |
| JOL401       | 11.5                 | 25.0 | 38.5 |
| JOL912       | 8.1                  | 15.8 | 23.4 |
| JOL1800 ORAL | -0.2                 | 6.0  | 12.2 |
| JOL1800 IM   | -0.8                 | 5.2  | 11.1 |

Supplementary Figure 3: Statistical analysis of recovery time (RT) of JOL strains.

A 3 days post-infection

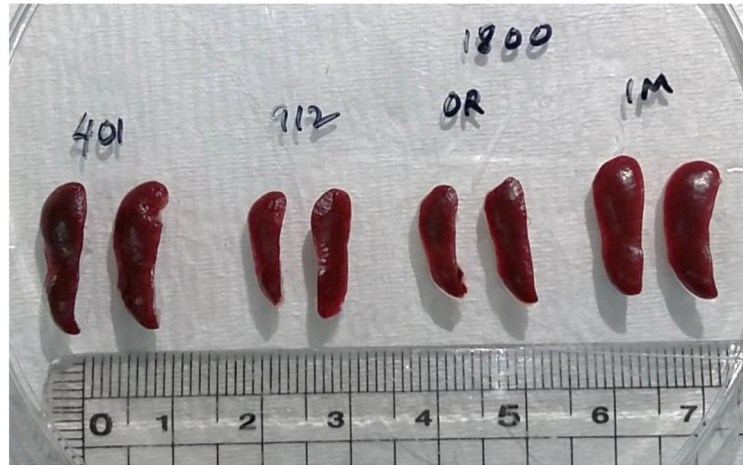

B 14 days post-infection

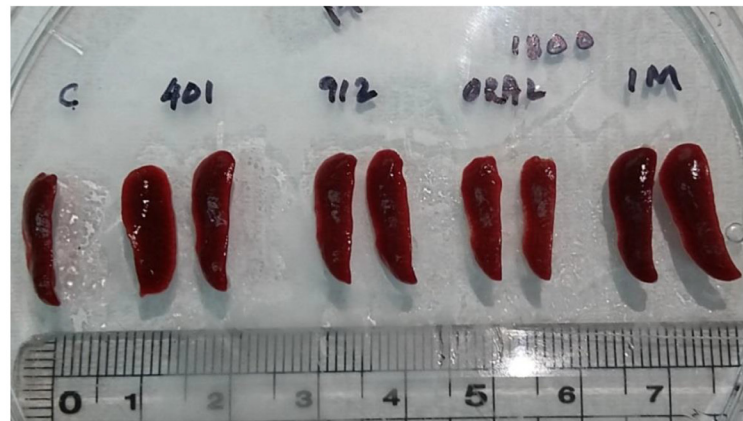

**Supplementary Figure 4: Relative splenic morphology and size, post *Salmonella* strains mock infections, representative spleens isolated from mock infected mice.** Splenomegaly and congestion was observed in spleens of JOL401 orally infected mice, splenomegaly was also observed in spleens of mice JOL1800 infected via IM at 3 and 14 days post-infection (A and B).

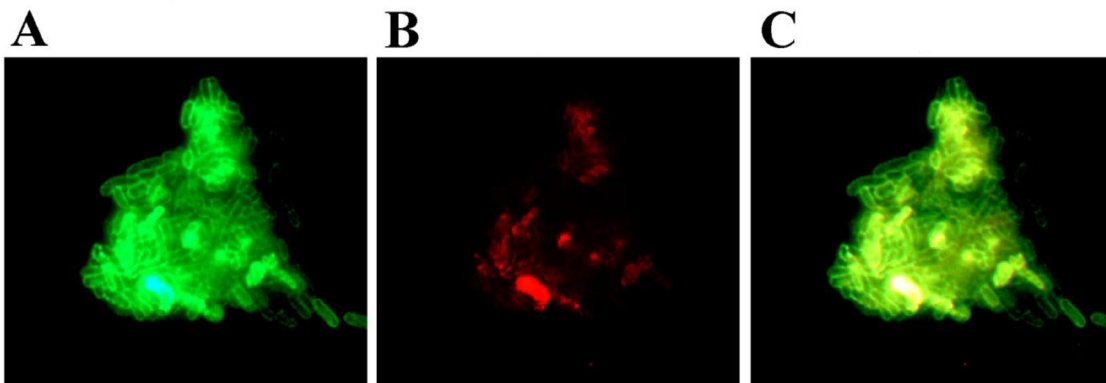

**Supplementary Figure 5: Fluorescence staining and microscopy of *Salmonella* expressing HA antigen.** (A) FITC channel, *Salmonella* bacteria were stained with primary chicken anti-*Salmonella* hyperimmune serum (1:1000) and secondary goat anti-chicken IgY H&L-Alexa Fluor® 488 (Abcam, UK) (1:2000), (B) Rhodamine channel, HA antigen was detected using primary rabbit anti-HA antibody (GenScript, US) at 1:1000 dilution and secondary goat anti-rabbit IgG H&L-Alexa Fluor® 647 at 1:2000 dilution (Abcam, UK), (C) Merged image. Fluorescence images from green and red channels were merged to form composite image.
